# Supplementary material for: Functional Evolution of Pseudofabraea citricarpa as an Adaptation to Temperature Change
Source: MDPI journal article supplement (doi:10.3390/jof10020109), 2024-01-28
Supplement: s1 [file s1]

# Functional evolution of *Pseudofabraea citricarpa* as an adaptation to climate change

LIU Sai-fei<sup>1,†</sup>, CHEN Li<sup>2,†</sup>, QIAO Xing-hua<sup>2</sup>, REN Jie-qun<sup>3</sup>, ZHOU Chang-yong<sup>4,\*</sup>, YANG Yu-heng<sup>1,\*</sup>

<sup>1</sup> Key Laboratory of Agricultural Biosafety and Green Production of Upper Yangtze River (Ministry of Education), College of Plant Protection, Southwest University, Beibei, Chongqing, 400716, China

<sup>2</sup> Plant Protection and Fruit Tree Technology Extension Station of Wanzhou District in Chongqing, 404199, China

<sup>3</sup> The Chongqing Three Gorges Academy of Agricultural Sciences, 404150, China

<sup>4</sup> Citrus Research Institute, Southwest University, Beibei, Chongqing, 400712, China

\* Correspondence: zhoucy@cric.cn (C.Z.); yyh023@swu.edu.cn (Y.Y.)

† These authors contributed equally to this work.

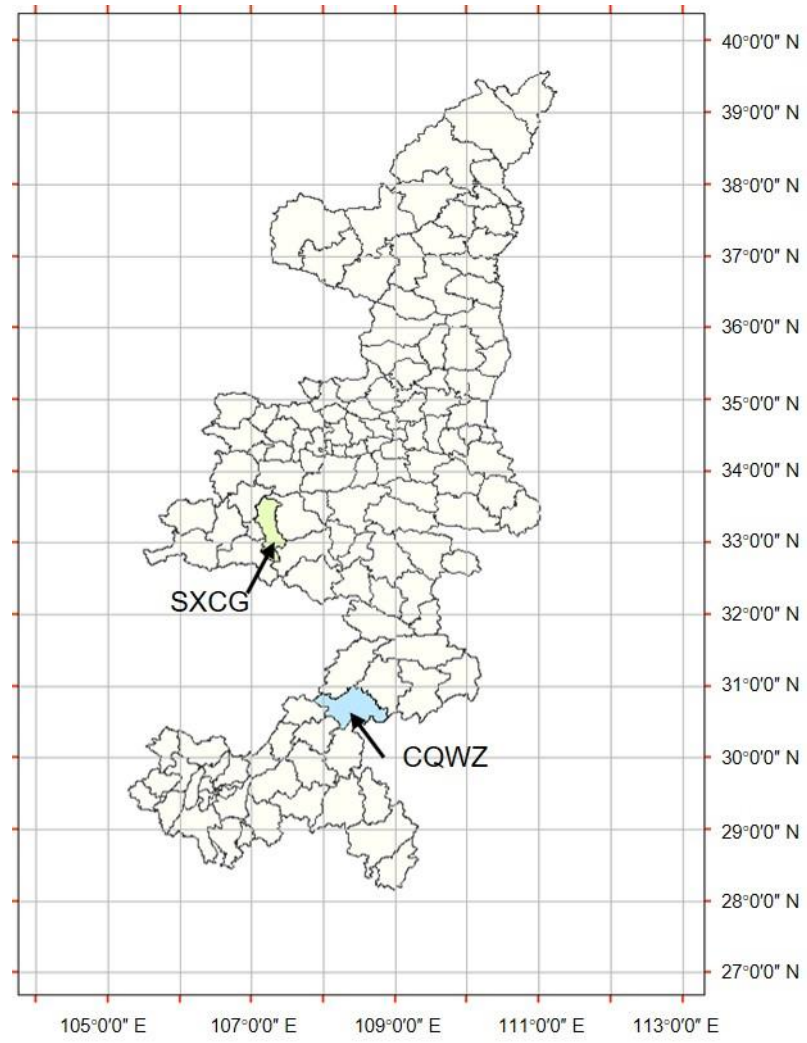

**Figure S1.** Geographical location of *Pseudofabreaa citricarpa* sampling.

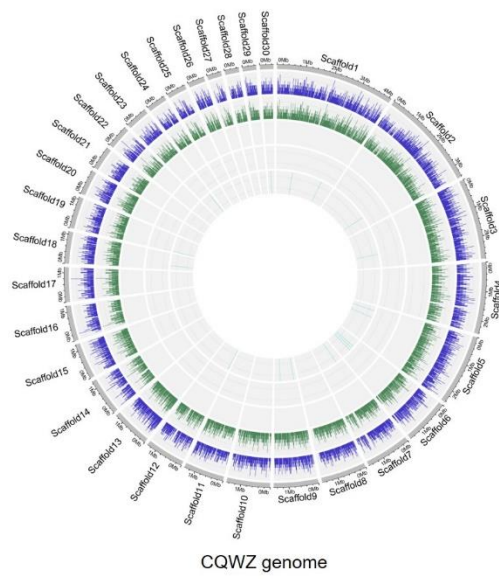

CQWZ genome

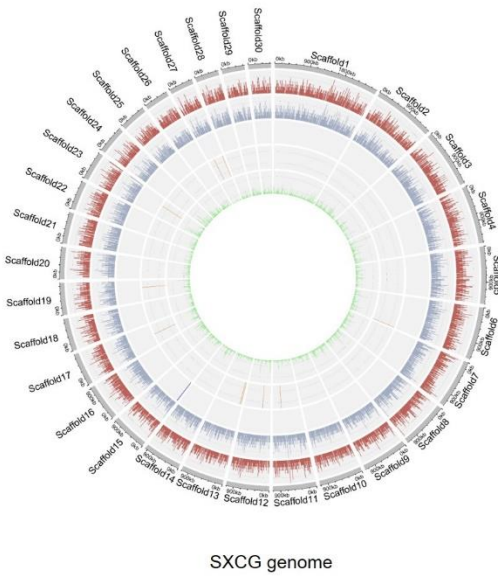

SXCG genome

**Figure S2.** Genome assembly mapping of *Pseudofabrea citricarpa*.

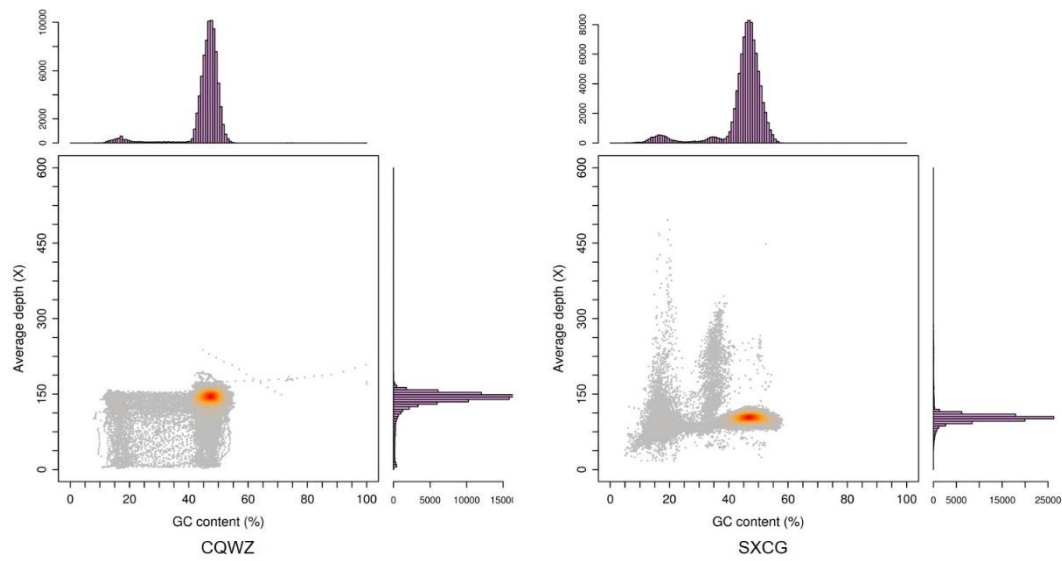

**Figure S3.** GC depth distribution analysis of *Pseudofabreaa citricarpa*.

The original reads from the PE library were aligned to the assembled sequence using SOAP software to obtain base coverage depth. A window of a chosen size was selected to move along the sequence base by base (or non-repetitive base by base), and the average depth and GC content were calculated for each window. This information was used to generate a GC-depth plot.

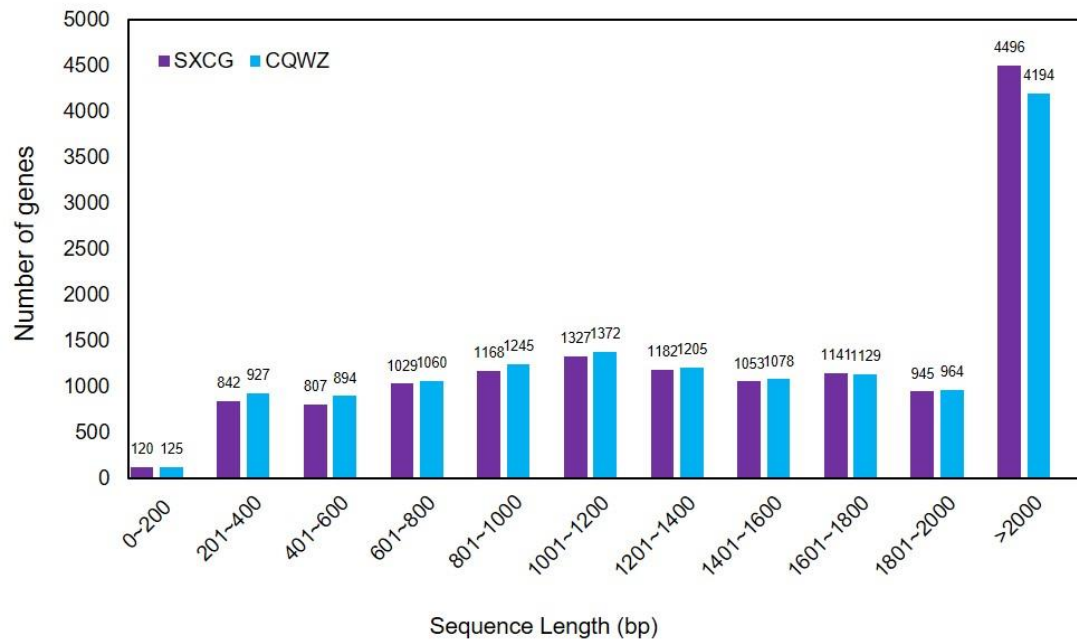

**Figure S4.** Length of genes encoded in the genome of *Pseudofabreaa citricarpa*.

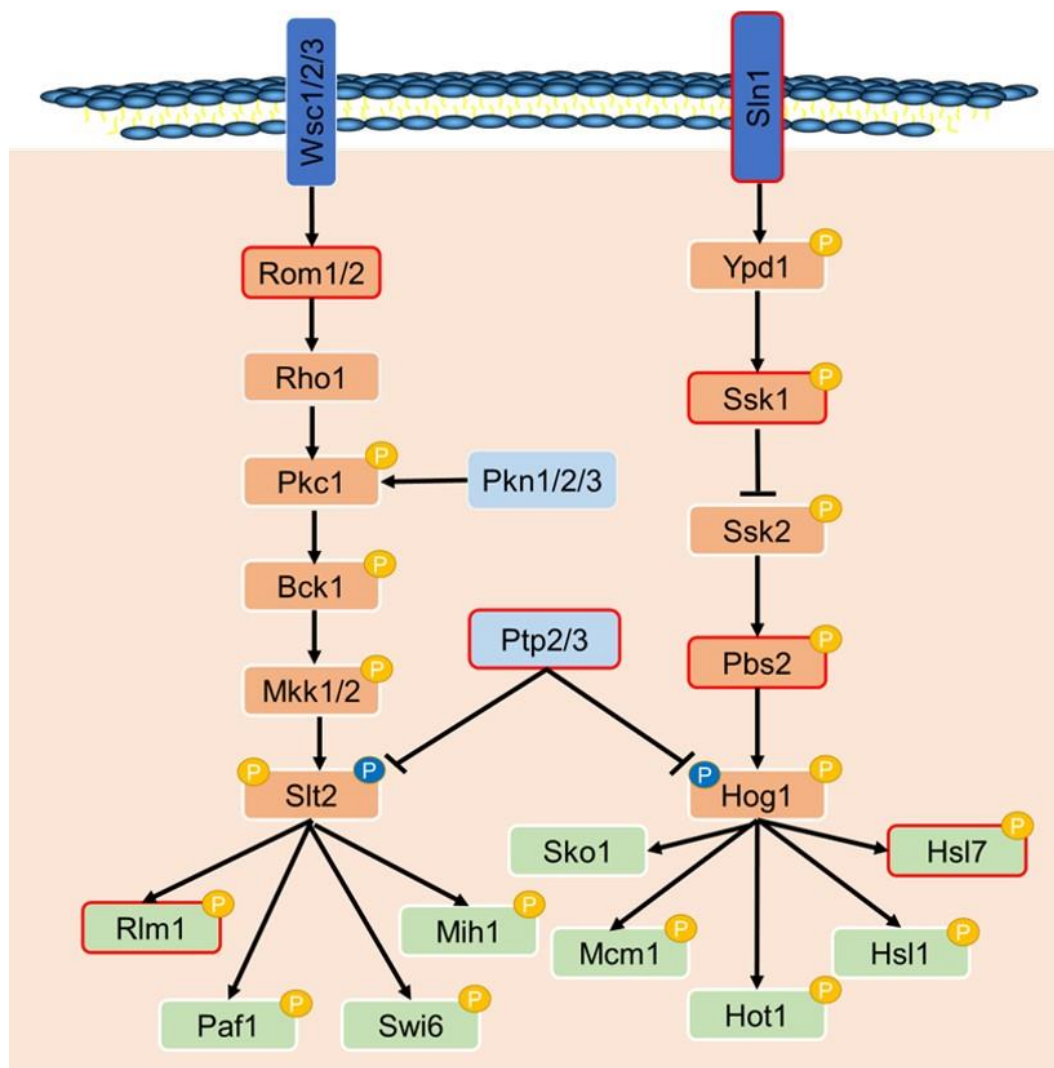

**Figure S5.** Differences between the two strains in the MAPK pathway. Red boxes indicate amino acid sequence differences.



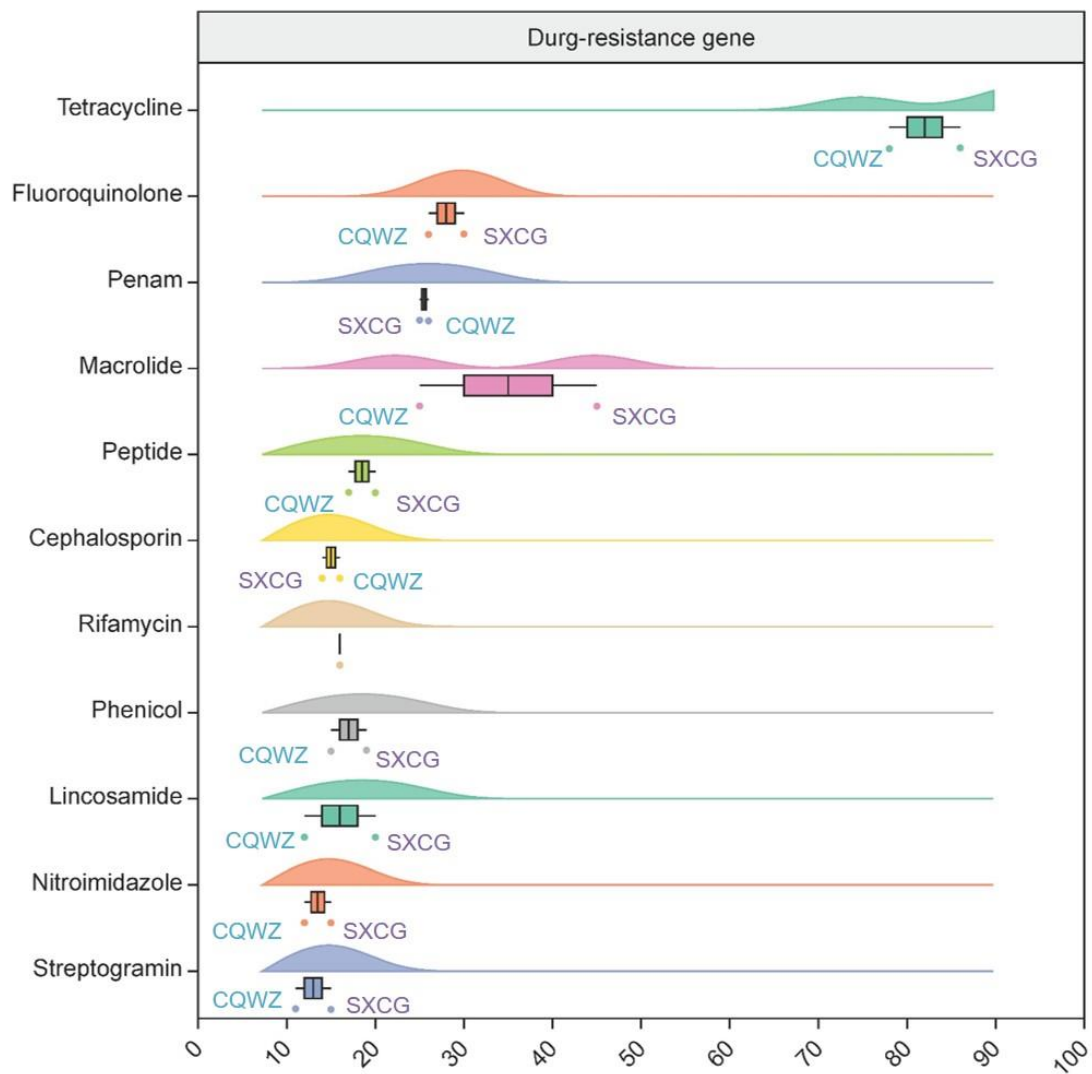

**Figure S7.** Differences in the number of resistance genes between the SXCG and CQWZ.
